# Supplementary material for: New polytriazoleimides containing green synthesized titanium dioxide using Artemisia pallens plant extract: optical, dielectric, thermal and mechanical properties
Source: Royal Society of Chemistry journal article supplement (doi:10.1039/c6nj03164a), 2017-01-01
Supplement: c6nj03164a1.pdf [file c6nj03164a1.pdf]

**New Polytriazoleimides containing green synthesized titanium dioxide using  
*Artemisia pallens* plant extract: optical, dielectric, thermal and mechanical properties**

**Balasubramanian R\*, Fathima Rigana M, Balaji S, Selvamani A and Sarojadevi M**

*Department of Chemistry, Anna University, Chennai-600025, India.*

**Characterization of *Artemisia pallens* extracts**

The GC-MS chromatogram of the *Artemisia pallens* water extract shown in fig 1a. It showed 7 prominent peaks with very narrow retention time. The fragmentation patterns for some of the peaks were comparable with the standard compounds and data is shown in Table 1. The GC-MS analysis revealed that the derivative of the compound 5-hepten-3-one was predominantly present in the water based extract with the retention time of 17.12 min. This compound shows a molecular ion peak at 236 and a base peak at 111, Fig 1(b). The second largest compound extracted out with the retention time of 6.644 min was found to be 5, 5-Dimethyl- 2 (5H) - Furanone. This derivative shows a molecular ion peak at 112 and a base peak at 97.05, Fig 1(c). The third major derivative was eluted at 2.406 min was found to be 2-pentanol. This compound has a molecular ion peak at 73 and a base peak at 45.0 Fig 1(d). It was expected that the above major compounds along with the other derivatives present in the water-based extract from the plant material are responsible for the formation of nano TiO<sub>2</sub> through hydrolysis and condensation reactions.

**Table 1**

GCMS peak report.

| Peak | R.Time | Area   | Area% | Height | Height% | A/H  | Name                                                        |
|------|--------|--------|-------|--------|---------|------|-------------------------------------------------------------|
| 1    | 2.406  | 58191  | 4.59  | 34623  | 6.03    | 1.68 | 2-Pentanol                                                  |
| 2    | 6.644  | 216359 | 17.07 | 65116  | 11.34   | 3.32 | 2(5H)-Furanone,                                             |
| 3    | 8.250  | 42213  | 3.33  | 23240  | 4.05    | 1.82 | 2(3H)-Furanone,                                             |
| 4    | 11.452 | 31477  | 2.48  | 21733  | 3.79    | 1.45 | Ethanone,                                                   |
| 5    | 17.120 | 771165 | 60.84 | 360771 | 62.84   | 2.14 | 5-Hepten-3-one,                                             |
| 6    | 18.633 | 79423  | 6.27  | 30677  | 5.34    | 2.59 | 2-(1-Hydroxy<br>ethyl)-5-methyl-5-vinyl-<br>tetrahydrofuran |
| 7    | 18.855 | 35064  | 2.77  | 21124  | 3.68    | 1.68 | 4-Hepten-3-one                                              |

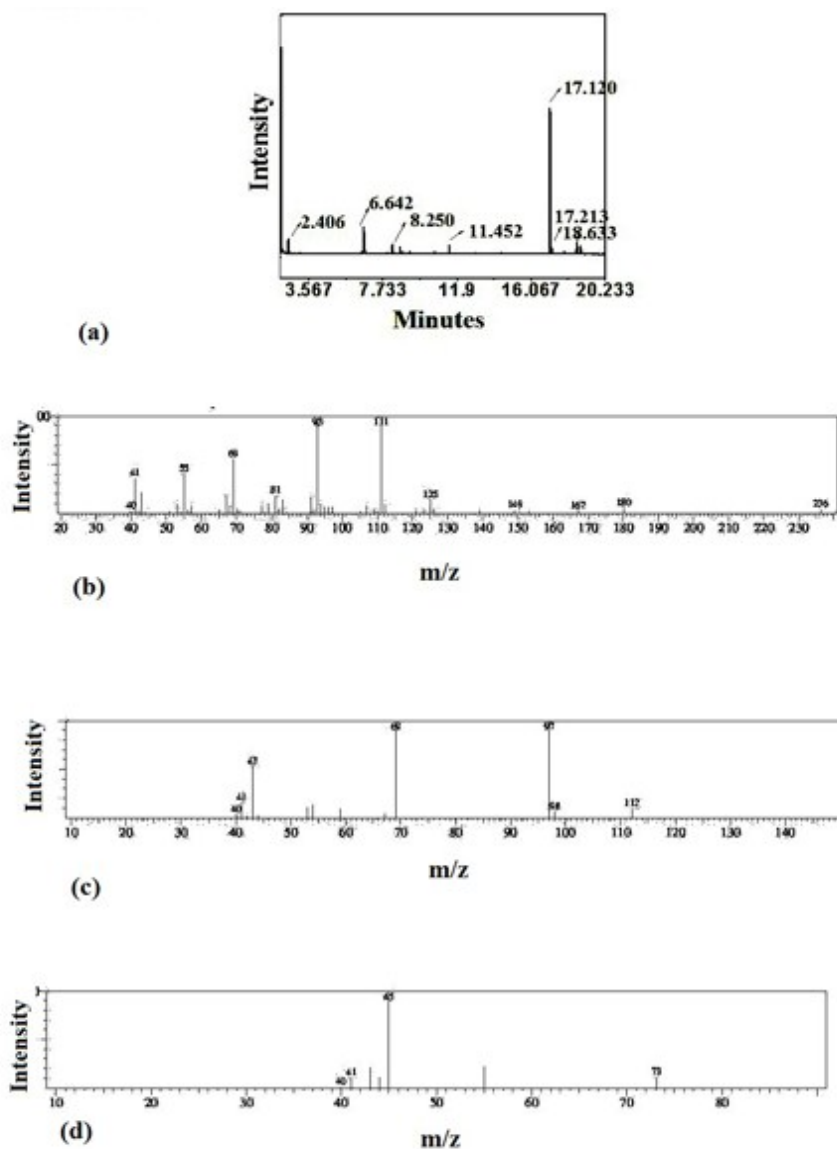

**Figure 1.** (a) GCMS of *Artemisia Pallens* plant extract, (b) Mass spectra of compound at retention time 17.12 min, and a base peak at 111, (c) Mass spectra of compound at retention time of 6.644 min, and a base peak at 97.05 (d) Mass spectra of compound at retention time of 2.406 min , and base peak at 45.0.
